# Supplementary material
Source: publisher figshare collection journal article supplement (https://rs.figshare.com/ndownloader/files/12191078)
Supplement: Supplementary file 1 [file 12191078]

## Sheet: Raw data
Subject n0	sex (1 = M, 2 = F)	Baby Age (days)	Baby Weight (kg)	Baby Cry F0 (Hz)	Child Age (days)	Child Speech F0 (Hz)	Child Weight (kg)	Child Height (cm)	Right hand 2D:4D ratio	Left hand 2D:4D ratio
1	1	108	7.3	384	2034	246	23	123	0.867228	0.962289
2	1	103	6.7	429	1535	292	15	102	0.963752	1.01747
3	2	124	7.1	437	2072	280	26	120	1.01961	0.984807
4	1	118	6.2	412	1601	257	16.5	104	0.981464	0.894446
5	2	109	5.6	388	1574	278	15	105	0.945439	0.884509
6	1	100	5.3	533	1558	312	15.8	96.5	0.996682	0.958976
7	1	153	7	447	2154	270	21	130	0.917857	0.921087
8	1	131	6.3	435	2128	271	20	116	0.950778	0.896199
9	1	121	6.7	399	2112	260	20	112	0.93622	0.899947
10	2	130	5.5	543	1628	305	14	102	0.985114	0.906641
11	2	91	4.3	431	2058	273	19	114	0.947553	0.948234
12	1	99	5.5	395	1961	216	15	103	0.926046	0.888037
13	2	107	5.6	392.5	1700	254	19	111	0.904051	0.924245
14	1	132	5	442	1711	250	17	105	0.925519	0.889823
15	2	83	4.5	503	2106	254	20.1	114	0.936045	0.939978

## Sheet: Table S1
Table S1. Descriptive correlation matrix reporting bivariate relationships among all measured parameters
Pearson correlations (r)
		Baby Age (days)	Baby Weight (kg)	Baby Cry F0 (Hz)	Child Age (days)	Child Speech F0 (Hz)	Child Weight (kg)	Child Height (cm)	Right hand 2D:4D	Left hand 2D:4D
Baby Age (days)	Pearson Correlation	1	.527*	0.009	0.128	0.131	0.18	0.365	0.049	-0.314
	Sig. (2-tailed)		0.043	0.975	0.65	0.642	0.522	0.181	0.862	0.254
	N	15	15	15	15	15	15	15	15	15
Baby Weight (kg)	Pearson Correlation	.527*	1	-0.376	0.195	0.016	0.46	0.462	-0.058	0.267
	Sig. (2-tailed)	0.043		0.167	0.486	0.955	0.084	0.083	0.837	0.335
	N	15	15	15	15	15	15	15	15	15
Baby Cry F0 (Hz)	Pearson Correlation	0.009	-0.376	1	-0.169	.637*	-0.224	-0.276	.517*	0.16
	Sig. (2-tailed)	0.975	0.167		0.546	0.011	0.422	0.319	0.048	0.569
	N	15	15	15	15	15	15	15	15	15
Child Age (days)	Pearson Correlation	0.128	0.195	-0.169	1	-0.409	.741**	.803**	-0.308	-0.02
	Sig. (2-tailed)	0.65	0.486	0.546		0.13	0.002	0	0.264	0.944
	N	15	15	15	15	15	15	15	15	15
Child Speech F0 (Hz)	Pearson Correlation	0.131	0.016	.637*	-0.409	1	-0.184	-0.251	.648**	0.402
	Sig. (2-tailed)	0.642	0.955	0.011	0.13		0.512	0.366	0.009	0.138
	N	15	15	15	15	15	15	15	15	15
Child Weight (kg)	Pearson Correlation	0.18	0.46	-0.224	.741**	-0.184	1	.841**	-0.141	0.325
	Sig. (2-tailed)	0.522	0.084	0.422	0.002	0.512		0	0.615	0.237
	N	15	15	15	15	15	15	15	15	15
Child Height (cm)	Pearson Correlation	0.365	0.462	-0.276	.803**	-0.251	.841**	1	-0.409	0.133
	Sig. (2-tailed)	0.181	0.083	0.319	0	0.366	0		0.13	0.637
	N	15	15	15	15	15	15	15	15	15
Right hand 2D:4D ratio	Pearson Correlation	0.049	-0.058	.517*	-0.308	.648**	-0.141	-0.409	1	0.213
	Sig. (2-tailed)	0.862	0.837	0.048	0.264	0.009	0.615	0.13		0.445
	N	15	15	15	15	15	15	15	15	15
Left hand 2D:4D ratio	Pearson Correlation	-0.314	0.267	0.16	-0.02	0.402	0.325	0.133	0.213	1
	Sig. (2-tailed)	0.254	0.335	0.569	0.944	0.138	0.237	0.637	0.445
	N	15	15	15	15	15	15	15	15	15
* Correlation is significant at the 0.05 level (two-tailed).
** Correlation is significant at the 0.01 level (two-tailed).
